# Supplementary material for: Boron-based octahedral dication experimentally detected: DFT surface confirms its availability
Source: PubMed Central journal article supplement — RSC Adv. 2023 Jun 28;13(28):19627–37. doi: 10.1039/d3ra03665k (PMC10305729; doi:10.1039/d3ra03665k), 2023-06-28
Supplement: RA-013-D3RA03665K-s001.pdf [file RA-013-D3RA03665K-s001.pdf]

## Electronic Supplementary Information

### The Electron Sextet on Carbon and the Electron Deficiency on Boron Readily Combine together: Boron-Based Octahedral Dication as a Result

Willi Keller,<sup>\*a</sup> Menyhárt B. Sárosi,<sup>b,†</sup> Jindřich Fanfrlík,<sup>c</sup> Michal Straka,<sup>c</sup> Josef Holub<sup>d</sup> and Drahomír Hnyk<sup>\*d</sup>

<sup>a</sup> *Institut für Chemie, Universität Hohenheim, Garbenstrasse 30, D-70599 Stuttgart, Germany*

<sup>b</sup> *Wilhelm-Ostwald-Institut für Physikalische und Theoretische Chemie, Universität Leipzig, Linnéstrasse 2, D-04103 Leipzig, Germany. Present address: Zentrum für Nanosystemchemie, Universität Würzburg, Theodor-Boveri-Weg, 97074 Würzburg, Germany*

<sup>c</sup> *Institute of Organic Chemistry and Biochemistry of the Czech Academy of Sciences, Flemingovo nám. 2, CZ-166 10 Praha 6, Czech Republic*

<sup>d</sup> *Institute of Inorganic Chemistry of the Czech Academy of Sciences, CZ-250 68 Husinec-Řež, Czech Republic*

### Experimental section

**Instrumentation.** NMR spectra were recorded on Bruker AVANCE III 500 (<sup>11</sup>B 160.388 MHz, <sup>31</sup>P 202.363 MHz) and AVANCE III HD 600 (<sup>11</sup>B 192.552 MHz, <sup>31</sup>P 242.945 MHz, <sup>13</sup>C 150.908 MHz, <sup>1</sup>H 600.15 MHz) at 293 K if not stated otherwise. Chemical shifts were referenced to ext. BF<sub>3</sub>·OEt<sub>2</sub> (<sup>11</sup>B) and 85% H<sub>3</sub>PO<sub>4</sub> (<sup>31</sup>P) and TMS. Negative signs indicate an upfield shift. The NMR spectra were processed using SpinWorks 4 (v 4.2.3.0 Kirk Marat, University of Manitoba, Canada) software. High- and low-resolution mass spectra were obtained on a Finnigan Varian MAT 95 with electron ionization at 70 eV.

**General Procedures and Materials.** All manipulations were conducted using standard high vacuum or inert atmosphere techniques as described by Shriver.<sup>1</sup> Reaction vessels were constructed by sealing the Pyrex 13 mm glass tube of a right-angle PTFE high vacuum valve (J. Young Scientific Glassware, Acton, London) at one end and equipping the other end with an O-ring seal for greaseless connection to the vacuum-line. Solvents were reagent grade, dried and purified according to standard procedures and were finally degassed in repeated freeze-pump-thaw cycles before use. 3-Bis-(2,6-diisopropylphenyl)-imidazol-2-yliden („Idip”) was obtained from Sigma-Aldrich and was used as received after degassing under high-vacuum. PBr<sub>3</sub> and AsBr<sub>3</sub> were freshly vacuum-distilled before use. BBr<sub>3</sub> was stirred over mercury, degassed, and condensed into a trap of -78°C prior to use. Diboron tetrabromide B<sub>2</sub>Br<sub>4</sub> was prepared by co-condensation of BBr<sub>3</sub> with copper-vapor onto cooled walls (-196 °C) of a metal-vapor reactor similar to that described by Timms.<sup>2</sup> After reaction, B<sub>2</sub>Br<sub>4</sub> was separated from excess BBr<sub>3</sub> by repeated fractionation until the condensate exhibited a vapor pressure of less than 1 Torr. The pnictogenaboranes Pn<sub>2</sub>B<sub>4</sub>Br<sub>4</sub> (Pn = As or P) were prepared by co-pyrolyses of appropriate mixtures of B<sub>2</sub>Br<sub>4</sub> with PnBr<sub>3</sub> and were separated according to the conditions given in the literatures as mentioned in the main text.

**Reactions of *closo*-1,2- $Pn_2B_4Br_4$  ( $Pn = P, As$ ) with 1,3-Bis-(2,6-diisopropylphenyl)-imidazol-2-yliden („Idip”) to monocationic 1,6-Idip<sub>2</sub>- $P_2B_4Br_3^+$ , 4-Idip- $Pn_2B_4Br_3^+$  (1:  $Pn = P$ ; 2:  $Pn = As$ ) and dicationic 3,5-Idip<sub>2</sub>- $P_2B_4Br_2^{2+}$  (3) :** In typical reactions, 0.016 mmols of *closo*-1,2- $Pn_2B_4Br_4$  (6.8 mg  $Pn = P$ ; 8.2 mg  $Pn = As$ ) were dissolved in 4 mL  $CH_2Cl_2$  and a dilution of 12.4 mg (0.032 mmol) Idip in 2 mL  $CH_2Cl_2$  was syringed into the stirred solution at  $-78^\circ C$  under a constant flow of inert gas. After closure of the Teflon stopcock the mixture was allowed to slowly warm up to room temperature. The still clear solution was syringed under inert gas into an NMR tube and immediately thereafter was analyzed with NMR. After ca 1 h at room temperature a pale white solid started to precipitate. The reaction was completed after 16 h at  $0^\circ C$  for  $Pn = P$ . For  $Pn = As$  completion was not accomplished due to degradation reactions.

Data for (1a+1b)/2:  $^{11}B$  NMR (ppm,  $CH_2Cl_2$ ) -2.6 ppm (B3,5), 10.2 ppm (B4), 15.8 ppm (B6).  $^{31}P$  NMR (ppm,  $CH_2Cl_2$ ) -122.7 ppm (P2), d,  $^1J(PP) = 218$  Hz; -56.0 ppm (P1), d (br),  $^1J(PP) = 192$  Hz.

Data for 2:  $^{11}B$  NMR (ppm,  $CH_2Cl_2$ ) 7.2 ppm (B3,5), 21.5 ppm (B4), 23.5 ppm (B6).

Data for 3:  $^{11}B$  NMR (ppm,  $CH_2Cl_2$ ) -1.2 ppm (B3,5), 17.4 ppm (B4,6).  $^{31}P$  NMR (ppm,  $CH_2Cl_2$ ) -145.7 ppm (P1,2). MS (neg. ESI)  $m/z$  1272.6 as anionic adduct with 2Br<sup>-</sup>/Cl<sup>-</sup>/HCl.

**Computational details.** Magnetic-property computations were obtained by means of the GIAO-PBE1PBE method incorporated into Gaussian16<sup>3</sup> utilizing the IGLO-II basis with the B3LYP/6-311+G(2d,p) + D3(BJ) geometries for IDip-based species and with the B3LYP/6-311+G(2d,p) geometries for NHC-based species. Second derivative analyses confirmed them to be minima on the respective potential energy surfaces. Additional NMR calculations were performed using the same geometries as in the quasi-relativistic GIAO-PBE1PBE computations with the Amsterdam Density Functional (ADF) code<sup>4</sup> employing the PBE0 functional. The two-component relativistic zeroth-order regular approximation (ZORA) method<sup>5</sup> including scalar and spin-orbit (SO)<sup>6</sup> corrections was employed for these computations; the all-electron triple-zeta basis set plus one polarization function (denoted TZ2P; from the ADF library) was used for all atoms. Magnetic shieldings were converted into relative  $^{11}B$  chemical shifts using the  $^{11}B$  NMR of  $B_2H_6$ <sup>7</sup> and the  $^{31}P$  NMR of  $PH_3$ <sup>8</sup> as the primary references, respectively. Reaction pathways were searched in terms of computing SMD energies in  $CH_2Cl_2$  or THF at the B3LYP/6-311+G(2d,p) + D3(BJ) level. Zero-point, heat-capacity, and entropy corrections with frequencies were carried out at the B3LYP/6-31+G(d) + D3(BJ) level. Electrostatic potentials were computed on 0.001 a.u. at the HF/cc-pVDZ level using Gaussian16 and Molekel4.3<sup>9</sup> programs. It has recently been shown that this basis set size is sufficient for these purposes.<sup>10</sup> The IAO/IBO method<sup>11</sup> was used to connect quantitative SCF wave functions to a qualitative chemical picture, naturally revealing the nature of the orbitals. The IBOview program was used.<sup>11</sup> The corresponding input files for the latter were generated at the B3LYP/def2-TZVP//B3LYP/6-311+G\*\* level using the Turbomole6.6<sup>12</sup> program package.

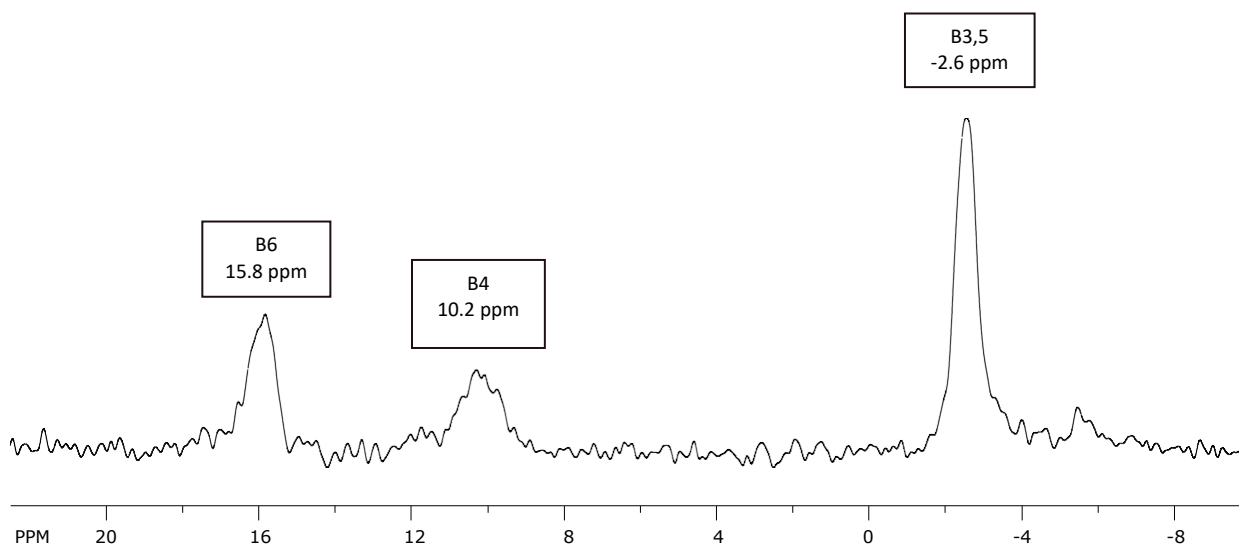

**Fig. S1** 160.388 MHz  $^{11}\text{B}$  NMR spectrum of the reaction of  $\text{P}_2\text{B}_4\text{Br}_4$  with IDip in  $\text{CH}_2\text{Cl}_2$  immediately after warm-up with the exclusive formation of a mixture of  $[\text{4-IDip-1,2-P}_2\text{B}_4\text{Br}_3]^+ \text{Br}^-$  (**1a**) and  $[\text{1,6-IDip}_2\text{-1,2-P}_2\text{B}_4\text{Br}_3]^+ \text{Br}^-$  (**1b**).

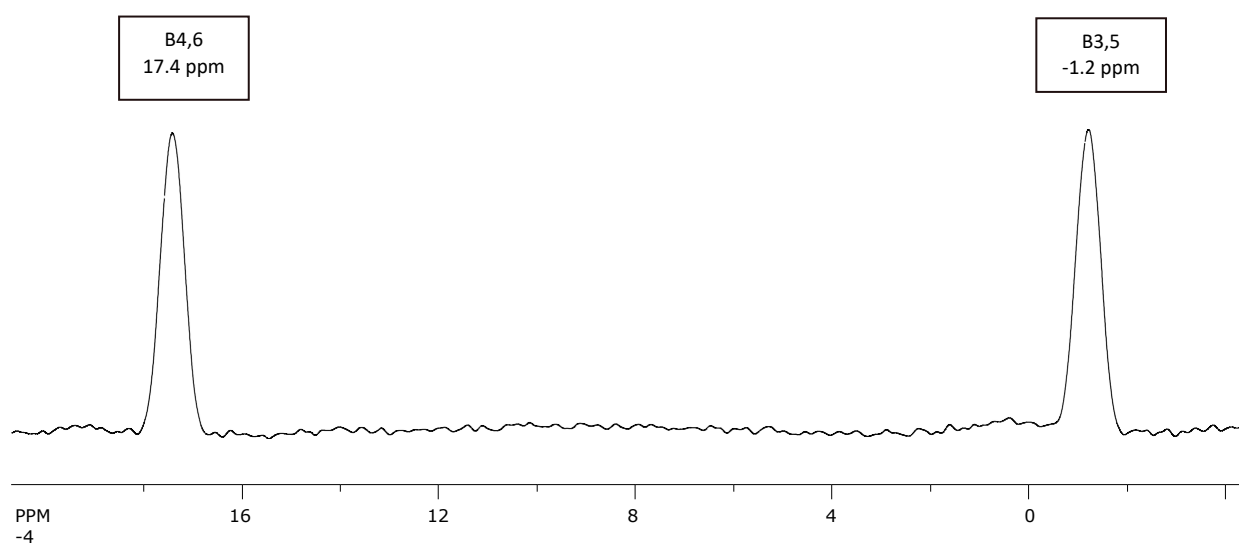

**Fig. S2** 160.388 MHz  $^{11}\text{B}$  NMR spectrum of the reaction of  $\text{P}_2\text{B}_4\text{Br}_4$  with Idip in  $\text{CH}_2\text{Cl}_2$  after 1 day at  $0^\circ\text{C}$ . Formation of  $[\text{3,5-Idip}_2\text{-1,2-P}_2\text{B}_4\text{Br}_2]^{2+} 2\text{Br}^-$  (**3**).

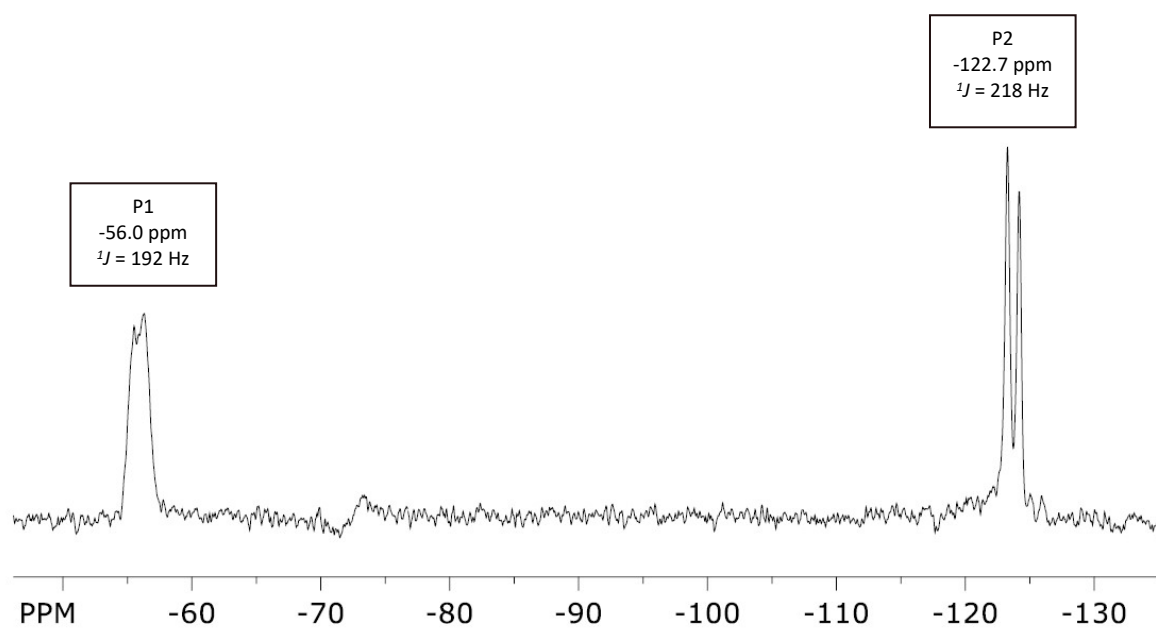

**Fig. S3** 242.945 MHz  $^{31}\text{P}$  NMR spectrum of the reaction of  $\text{P}_2\text{B}_4\text{Br}_4$  with Idip in  $\text{CH}_2\text{Cl}_2$  immediately after warm-up. Formation of a mixture of  $[\text{4-Idip-1,2-P}_2\text{B}_4\text{Br}_3]^+ \text{Br}^-$  (**1a**) and  $[\text{1,6-Idip}_2\text{-1,2-P}_2\text{B}_4\text{Br}_3]^+ \text{Br}^-$  (**1b**).

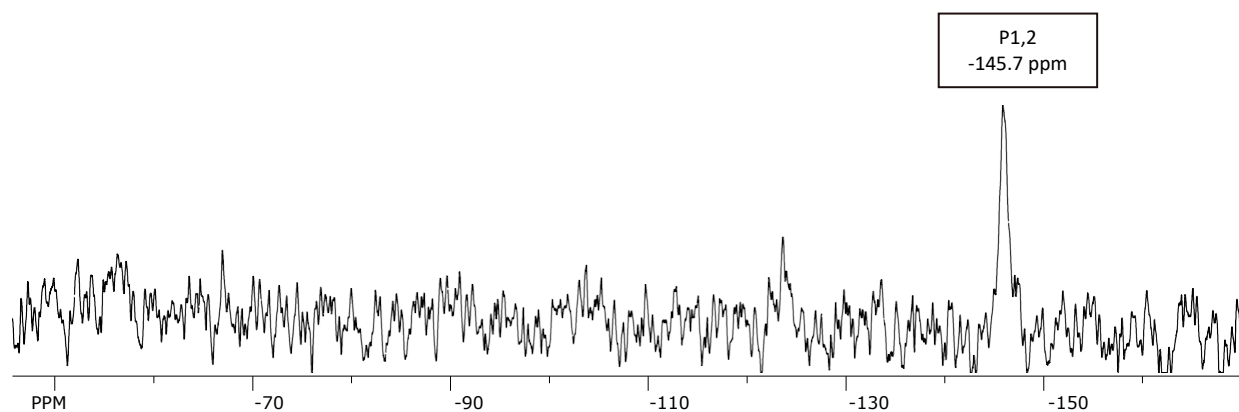

**Fig. S4** 242.945 MHz  $^{31}\text{P}$  NMR spectrum of the reaction of  $\text{P}_2\text{B}_4\text{Br}_4$  with Idip in  $\text{CH}_2\text{Cl}_2$  after 1 day at  $0^\circ\text{C}$ . Formation of  $[\text{3,5-Idip}_2\text{-1,2-P}_2\text{B}_4\text{Br}_2]^{2+} 2\text{Br}^-$ .

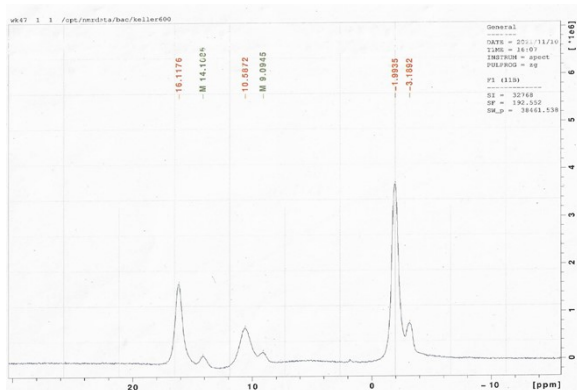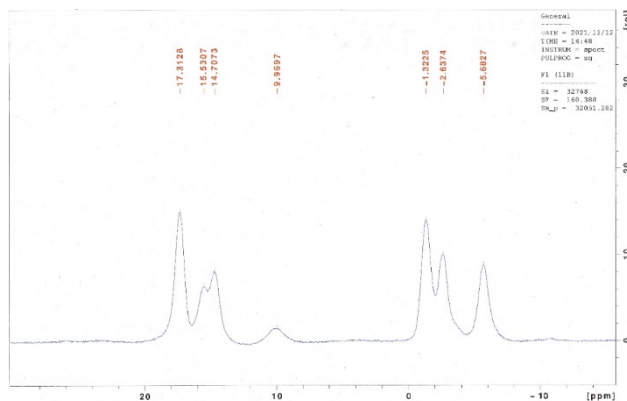

**Fig. S5** 160.388 MHz  $^{11}\text{B}$  NMR spectrum of two reactions of  $\text{P}_2\text{B}_4\text{Br}_4$  with Idip in THF in approximately 1:1 molar ratios immediately after warm-up. Left: 1<sup>st</sup> attempt, right: 2<sup>nd</sup> attempt. The differences in spectra between 1<sup>st</sup> and 2<sup>nd</sup> attempts could be caused by deviations of the molar amounts (the amount of only 8 mg of Idip could not be weighted exactly). Continuous formation of a mixture of  $[\text{4-Idip-1,2-P}_2\text{B}_4\text{Br}_3]^+ \text{Br}^-$  (**1a**) and  $[\text{1,6-Idip}_2\text{-1,2-P}_2\text{B}_4\text{Br}_3]^+ \text{Br}^-$  (**1b**).

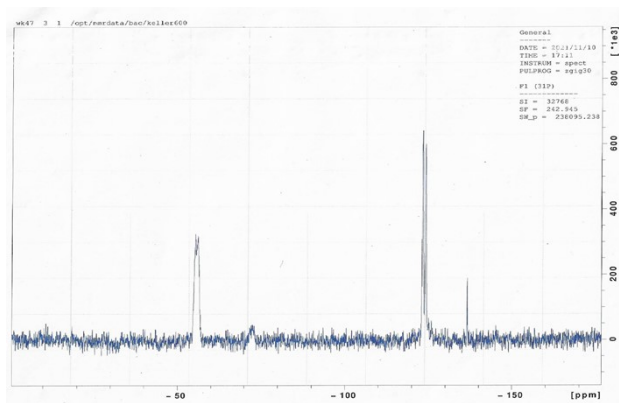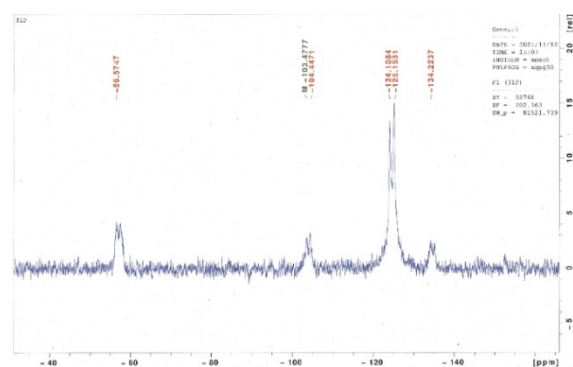

**Fig. S6** 202.363 MHz  $^{31}\text{P}$  NMR spectrum of two reactions of  $\text{P}_2\text{B}_4\text{Br}_4$  with Idip in THF immediately after recording of the  $^{11}\text{B}$  spectra of Fig. S5. Left: 1<sup>st</sup> attempt, right: 2<sup>nd</sup> attempt. Continuous formation of a mixture of  $[\text{4-Idip-1,2-P}_2\text{B}_4\text{Br}_3]^+ \text{Br}^-$  (**1a**) and  $[\text{1,6-Idip}_2\text{-1,2-P}_2\text{B}_4\text{Br}_3]^+ \text{Br}^-$  (**1b**).

| Acquisition Parameter |            |                       |           |                  |           |
|-----------------------|------------|-----------------------|-----------|------------------|-----------|
| Source Type           | ESI        | Ion Polarity          | Negative  | Set Nebulizer    | 0.4 Bar   |
| Focus                 | Not active | Set Capillary         | 2200 V    | Set Dry Heater   | 200 °C    |
| Scan Begin            | 250 m/z    | Set End Plate Offset  | -500 V    | Set Dry Gas      | 2.0 l/min |
| Scan End              | 3000 m/z   | Set Collision Cell RF | 500.0 Vpp | Set Divert Valve | Waste     |

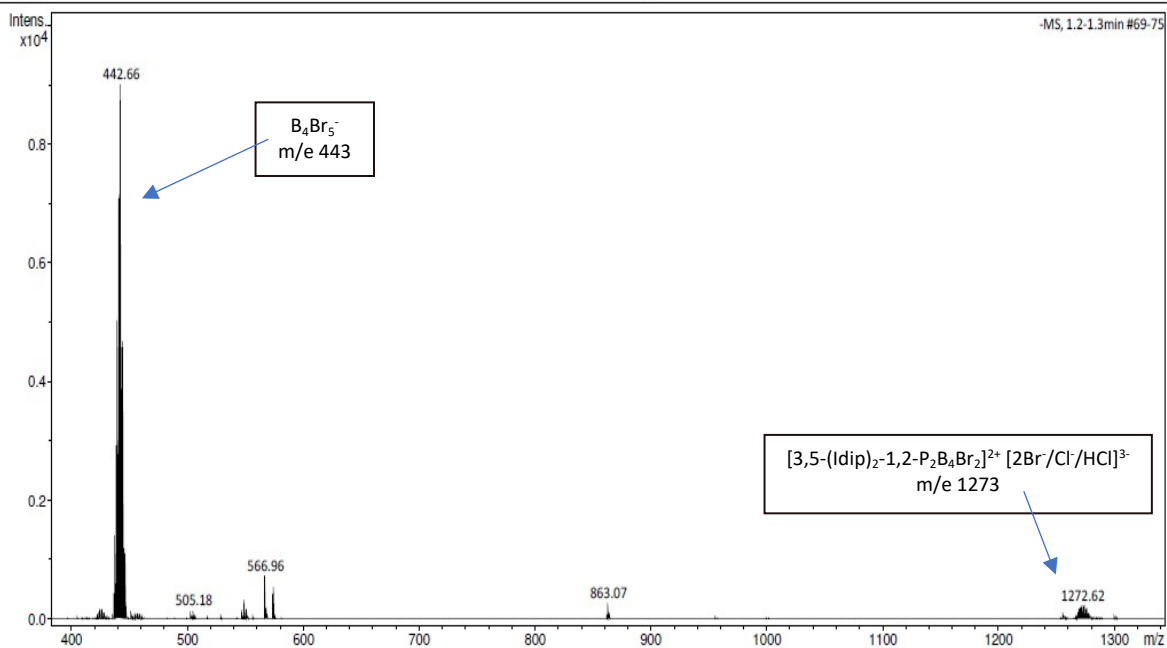

**Fig. S7** ESI-MS (negative ion polarity) with the adduct of  $[3,5-(Idip)_2-1,2-P_2B_4Br_2]^{2+}$  (**3**) with  $2Br^-/Cl^-/HCl$  at m/e 1273.

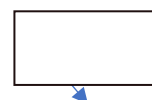

**Analysis Info**

Analysis Name Keller-P2B4Br4mitNHCinCH2Cl2.d  
Method tune-wide-oktober-2019.m  
Sample Name P2B4Br4 + NHC in CH2Cl2  
Comment

Acquisition Date 7/13/2022 3:54:20 PM

Operator BDAL@DE  
Instrument micrOTOF-Q 228888.00  
043

**Acquisition Parameter**

|             |            |                       |           |                  |           |
|-------------|------------|-----------------------|-----------|------------------|-----------|
| Source Type | ESI        | Ion Polarity          | Negative  | Set Nebulizer    | 0.4 Bar   |
| Focus       | Not active | Set Capillary         | 2200 V    | Set Dry Heater   | 200 °C    |
| Scan Begin  | 250 m/z    | Set End Plate Offset  | -500 V    | Set Dry Gas      | 2.0 l/min |
| Scan End    | 3000 m/z   | Set Collision Cell RF | 500.0 Vpp | Set Divert Valve | Waste     |

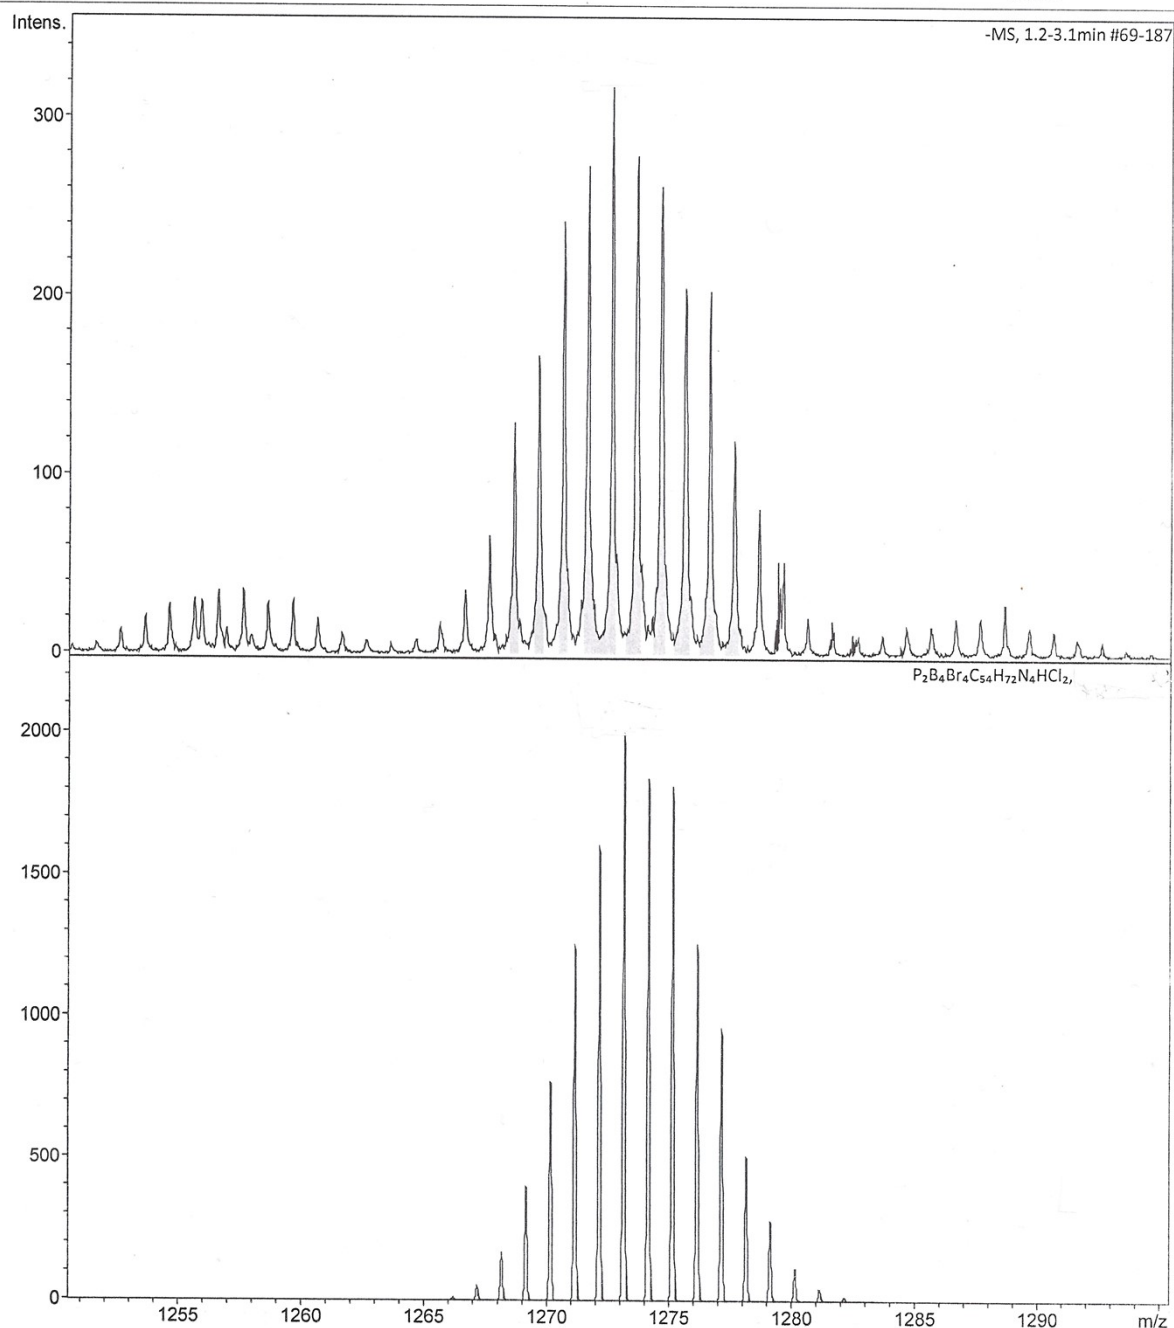

**Fig. S8** Sector of ESI-MS (negative ion polarity) with the adduct of  $[3,5\text{-Idip}_2\text{-}1,2\text{-P}_2\text{B}_4\text{Br}_2]^{2+}$  (3) with 2Br-/Cl-/HCl at m/e 1273 on top and calculated below.

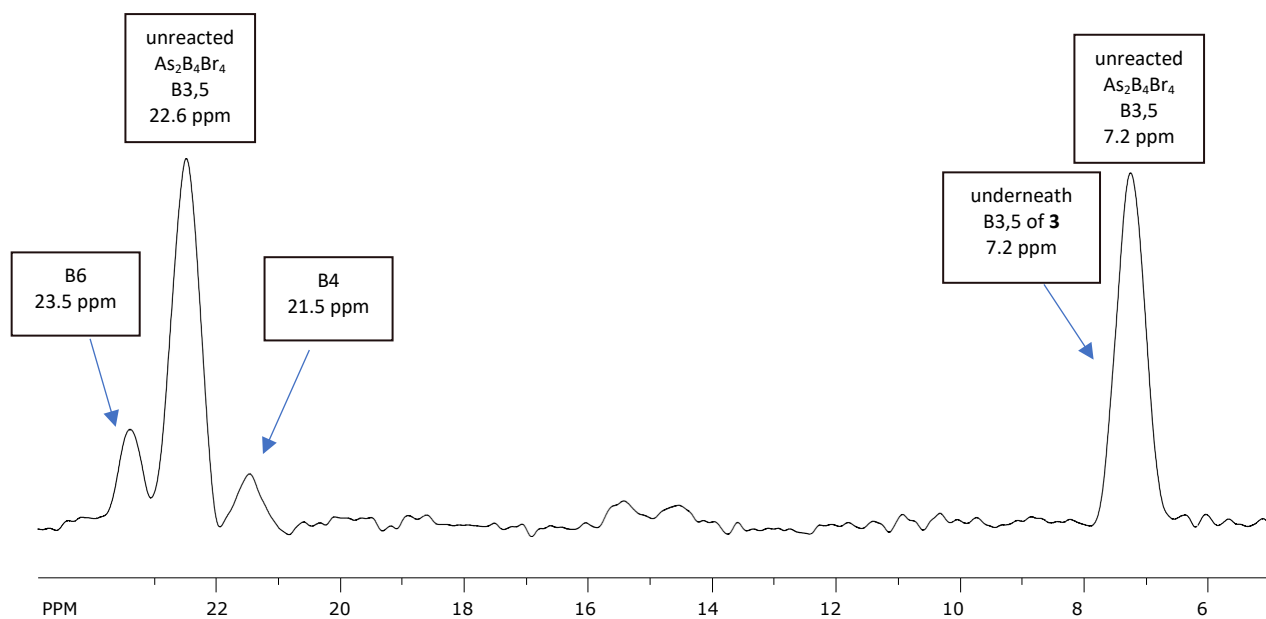

**Fig. S9** 192.55 MHz  $^{11}\text{B}$  NMR spectrum of the reaction of  $\text{As}_2\text{B}_4\text{Br}_4$  with Idip in  $\text{CH}_2\text{Cl}_2$  after 10 min heating at  $50^\circ\text{C}$ . Formation of  $[\text{4-Idip-As}_2\text{B}_4\text{Br}_3]^+\text{Br}^-$  (**2**) besides unreacted  $\text{As}_2\text{B}_4\text{Br}_4$ .

**Table S1** Species related to the reaction of ID and Idip ligands with  $\text{P}_2\text{B}_4\text{Br}_4$  in dichloromethane<sup>a</sup>

| species                                                 | PG              | B3LYP/<br>6-311+G(2d)<br>+D3BJ | ZPE    | NIF <sup>b</sup> | Entropy | Cp    | Solv <sup>c</sup> |
|---------------------------------------------------------|-----------------|--------------------------------|--------|------------------|---------|-------|-------------------|
| $\text{Br}^-$                                           | K               | -2574.232916                   | 0.00   | 0                | 39.01   | 1.48  | -49.21            |
| $\text{P}_2\text{B}_4\text{Br}_4$                       | $\text{C}_{2v}$ | -11078.975677                  | 15.23  | 0                | 114.78  | 8.05  | -8.91             |
| ID                                                      | $\text{C}_{2v}$ | -688.462899                    | 145.73 | -2               | 102.64  | 7.52  | -18.23            |
| ID                                                      | $\text{C}_2$    | -688.465093                    | 145.78 | 0                | 113.28  | 8.60  | -19.17            |
| Idip                                                    | $\text{C}_{2v}$ | -1160.380315                   | 358.82 | -2               | 184.08  | 18.33 | -20.67            |
| Idip                                                    | $\text{C}_2$    | -1160.380441                   | 358.94 | 0                | 196.60  | 19.43 | -20.71            |
| $\text{Br-Idip}^-$                                      | $\text{C}_{2v}$ | -3734.609491                   | 358.06 | -3               | 189.29  | 19.22 | -58.47            |
| $\text{Br-Idip}^-$                                      | $\text{C}_2$    | -3734.609368                   | 358.20 | -2               | 194.24  | 19.72 | -58.62            |
| $\text{Br-Idip}^-$                                      | $\text{C}_1$    | -3734.614001                   | 358.37 | 0                | 205.22  | 20.75 | -57.17            |
| $\text{Br-Idip}_2^-$                                    | $\text{D}_{2d}$ | -4894.990173                   | 716.44 | 0                | 303.25  | 35.95 | -65.26            |
| $\text{Br}_2\text{-Iip}_2^{-2}$                         | $\text{D}_2$    | -7469.175268                   | 716.50 | 0                | 371.23  | 42.04 | -135.51           |
| 1-ID- $\text{P}_2\text{B}_4\text{Br}_4$                 | $\text{C}_s$    | -11767.478268                  | 162.23 | 0                | 181.43  | 16.97 | -26.69            |
| 1,2-ID <sub>2</sub> - $\text{P}_2\text{B}_4\text{Br}_4$ | $\text{C}_{2v}$ | -12455.954094                  | 307.58 | 0                | 261.90  | 26.68 | -32.49            |
| 1,2-ID <sub>2</sub> - $\text{P}_2\text{B}_4\text{Br}_4$ | $\text{C}_1$    | -12455.954912                  | 308.84 | 0                | 255.90  | 26.29 | -38.89            |
| TS1-ID-a                                                | $\text{C}_1$    | -12455.943766                  | 308.28 | 194              | 242.43  | 25.64 | -35.11            |
| 1,6-ID <sub>2</sub> - $\text{P}_2\text{B}_4\text{Br}_4$ | $\text{C}_1$    | -12455.979391                  | 309.38 | 0                | 242.58  | 25.82 | -36.97            |



|                                                                                          |                 |               |        |     |        |       |         |
|------------------------------------------------------------------------------------------|-----------------|---------------|--------|-----|--------|-------|---------|
| 1,6-ID-P <sub>2</sub> B <sub>4</sub> Br <sub>3</sub> <sup>+</sup>                        | C <sub>s</sub>  | -9881.651361  | 310.33 | 0   | 234.01 | 24.32 | -58.58  |
| 4-ID-P <sub>2</sub> B <sub>4</sub> Br <sub>3</sub> -a <sup>+</sup>                       | C <sub>s</sub>  | -9193.116562  | 162.63 | -1  | 165.44 | 15.02 | -53.43  |
| 4-ID-P <sub>2</sub> B <sub>4</sub> Br <sub>3</sub> -b <sup>+</sup>                       | C <sub>s</sub>  | -9193.121915  | 162.56 | -1  | 168.85 | 15.17 | -54.42  |
| 4-ID-P <sub>2</sub> B <sub>4</sub> Br <sub>3</sub> -c <sup>+</sup>                       | C <sub>s</sub>  | -9193.124588  | 162.65 | -1  | 168.82 | 15.19 | -54.58  |
| 4-ID-P <sub>2</sub> B <sub>4</sub> Br <sub>3</sub> -d <sup>+</sup>                       | C <sub>1</sub>  | -9193.124849  | 162.87 | 0   | 171.74 | 15.61 | -52.99  |
| TS2-ID                                                                                   | C <sub>1</sub>  | -12455.944898 | 308.46 | 181 | 247.18 | 25.75 | -35.65  |
| 1,3-ID <sub>2</sub> -P <sub>2</sub> B <sub>4</sub> Br <sub>4</sub> -a                    | C <sub>1</sub>  | -12455.996757 | 310.60 | 0   | 247.66 | 25.84 | -38.92  |
| 1,3-ID <sub>2</sub> -P <sub>2</sub> B <sub>4</sub> Br <sub>4</sub> -b                    | C <sub>1</sub>  | -12455.997531 | 309.71 | 0   | 246.63 | 25.85 | -38.15  |
| 1,3-ID <sub>2</sub> -P <sub>2</sub> B <sub>4</sub> Br <sub>3</sub> <sup>+</sup>          | C <sub>1</sub>  | -9881.647344  | 310.37 | 0   | 234.81 | 24.44 | -63.23  |
| TS3(+)-ID                                                                                | C <sub>1</sub>  | -9881.606339  | 309.01 | 34  | 236.58 | 24.32 | -59.04  |
| 3,5-ID <sub>2</sub> -P <sub>2</sub> B <sub>4</sub> Br <sub>3</sub> <sup>+</sup>          | C <sub>1</sub>  | -9881.662383  | 310.68 | 0   | 233.76 | 24.31 | -58.08  |
| 3-ID-P <sub>2</sub> B <sub>4</sub> Br <sub>3</sub> <sup>+</sup>                          | C <sub>1</sub>  | -9193.126005  | 162.75 | 0   | 172.83 | 15.67 | -54.80  |
| 3,5-ID <sub>2</sub> -P <sub>2</sub> B <sub>4</sub> Br <sub>2</sub> <sup>+2</sup>         | C <sub>2</sub>  | -7307.211449  | 310.63 | 0   | 228.85 | 23.19 | -137.63 |
| [3,5-ID <sub>2</sub> -P <sub>2</sub> B <sub>4</sub> Br <sub>2</sub> ][Br] <sub>2</sub>   | C <sub>2</sub>  | -12456.040311 | 311.54 | 0   | 248.27 | 28.62 | -42.64  |
| TS4(+)-ID                                                                                | C <sub>1</sub>  | -9881.604703  | 309.58 | 127 | 234.36 | 24.26 | -59.78  |
| INT(+)-ID                                                                                | C <sub>1</sub>  | -9881.623918  | 309.76 | 0   | 241.76 | 24.75 | -59.25  |
| TS5(+)-ID                                                                                | C <sub>1</sub>  | -9881.605778  | 309.67 | 19  | 237.00 | 24.30 | -62.49  |
|                                                                                          |                 |               |        |     |        |       |         |
| 1-Idip-P <sub>2</sub> B <sub>4</sub> Br <sub>4</sub>                                     | C <sub>s</sub>  | -12239.385003 | 375.39 | 0   | 262.50 | 27.93 | -23.50  |
| 1-Idip-P <sub>2</sub> B <sub>4</sub> Br <sub>4</sub>                                     | C <sub>s</sub>  | -12239.402630 | 376.42 | 0   | 252.06 | 27.42 | -27.35  |
| 1,2-Idip <sub>2</sub> -P <sub>2</sub> B <sub>4</sub> Br <sub>4</sub>                     | C <sub>2v</sub> | -13399.795153 | 735.30 | -3  | 385.10 | 46.15 | -35.13  |
| 1,2-Idip <sub>2</sub> -P <sub>2</sub> B <sub>4</sub> Br <sub>4</sub>                     | C <sub>s</sub>  | -13399.800150 | 735.84 | -1  | 395.81 | 46.91 | -38.94  |
| TS11-Idip-a                                                                              | C <sub>1</sub>  | -13399.775217 | 737.47 | 156 | 377.01 | 45.95 | -34.72  |
| TS11-Idip-b                                                                              | C <sub>1</sub>  | -13399.783915 | 737.24 | 160 | 377.89 | 46.10 | -34.79  |
| 1,6-Idip <sub>2</sub> -P <sub>2</sub> B <sub>4</sub> Br <sub>4</sub>                     | C <sub>1</sub>  | -13399.829270 | 738.89 | 0   | 381.55 | 46.35 | -39.65  |
| 3-Idip-P <sub>2</sub> B <sub>4</sub> Br <sub>4</sub>                                     | C <sub>1</sub>  | -12239.404132 | 377.05 | 0   | 248.50 | 27.16 | -25.22  |
| 1,6-Idip <sub>2</sub> -P <sub>2</sub> B <sub>4</sub> Br <sub>3</sub> <sup>+</sup>        | C <sub>s</sub>  | -10825.500964 | 738.76 | -1  | 368.20 | 44.55 | -58.12  |
| 4-Idip-P <sub>2</sub> B <sub>4</sub> Br <sub>3</sub> -a <sup>+</sup>                     | C <sub>s</sub>  | -9665.056418  | 377.46 | 0   | 240.73 | 25.86 | -51.76  |
| 4-Idip-P <sub>2</sub> B <sub>4</sub> Br <sub>3</sub> -b <sup>+</sup>                     | C <sub>s</sub>  | -9665.052019  | 377.15 | 0   | 240.08 | 25.94 | -52.30  |
| TS22-Idip                                                                                | C <sub>1</sub>  | -13399.790019 | 736.98 | 82  | 382.75 | 46.35 | -35.24  |
| 1,3-Idip <sub>2</sub> -P <sub>2</sub> B <sub>4</sub> Br <sub>4</sub>                     | C <sub>1</sub>  | -13399.837779 | 738.26 | 0   | 382.38 | 46.45 | -37.03  |
| 1,3-Idip <sub>2</sub> -P <sub>2</sub> B <sub>4</sub> Br <sub>3</sub> <sup>+</sup>        | C <sub>1</sub>  | -10825.485110 | 738.86 | 0   | 375.72 | 45.27 | -61.21  |
| TS33(+)-Idip                                                                             | C <sub>1</sub>  | -10825.457323 | 737.54 | 153 | 377.56 | 45.22 | -59.56  |
| 3,5-Idip <sub>2</sub> -P <sub>2</sub> B <sub>4</sub> Br <sub>3</sub> <sup>+</sup>        | C <sub>1</sub>  | -10825.500224 | 739.12 | 0   | 372.84 | 45.15 | -59.34  |
| 3-Idip-P <sub>2</sub> B <sub>4</sub> Br <sub>3</sub> <sup>+</sup>                        | C <sub>s</sub>  | -9665.045953  | 376.81 | -2  | 233.55 | 25.07 | -54.52  |
| 3-Idip-P <sub>2</sub> B <sub>4</sub> Br <sub>3</sub> <sup>+</sup>                        | C <sub>1</sub>  | -9665.057519  | 377.05 | 0   | 243.70 | 26.07 | -54.39  |
| 1,2-Idip <sub>2</sub> -P <sub>2</sub> B <sub>4</sub> Br <sub>2</sub> <sup>+2</sup>       | C <sub>2v</sub> | -8250.833115  | 735.36 | -3  | 367.71 | 43.54 | -134.30 |
| 1,2-Idip <sub>2</sub> -P <sub>2</sub> B <sub>4</sub> Br <sub>2</sub> <sup>+2</sup>       | C <sub>2</sub>  | -8250.923877  | 737.16 | 0   | 365.18 | 44.16 | -133.71 |
| 3,5-Idip <sub>2</sub> -P <sub>2</sub> B <sub>4</sub> Br <sub>2</sub> <sup>+2</sup>       | C <sub>2v</sub> | -8251.060705  | 738.47 | -3  | 357.88 | 42.65 | -134.54 |
| 3,5-Idip <sub>2</sub> -P <sub>2</sub> B <sub>4</sub> Br <sub>2</sub> <sup>+2</sup>       | C <sub>2</sub>  | -8251.087386  | 738.47 | 0   | 357.88 | 42.65 | -133.72 |
| [3,5-Idip <sub>2</sub> -P <sub>2</sub> B <sub>4</sub> Br <sub>2</sub> ][Br] <sub>2</sub> | C <sub>2</sub>  | -13399.872545 | 739.71 | 0   | 394.00 | 46.74 | -43.60  |
| TS44(+)-Idip                                                                             | C <sub>1</sub>  | -10825.460278 | 737.83 | 143 | 378.78 | 45.27 | -59.50  |
| INT(+)-Idip-a                                                                            | C <sub>1</sub>  | -10825.470544 | 738.69 | 0   | 375.12 | 45.34 | -58.97  |
| INT(+)-Idip-b                                                                            | C <sub>1</sub>  | -10825.463969 | 738.58 | 0   | 375.18 | 45.31 | -60.38  |
| TS55(+)-Idip                                                                             | C <sub>1</sub>  | -10825.453653 | 738.00 | 216 | 377.88 | 45.17 | -60.70  |
| (ID) <sub>2</sub>                                                                        | D <sub>2</sub>  | -1376.965565  | 292.79 | 0   | 176.24 | 17.38 | -24.69  |
| (Idip) <sub>2</sub>                                                                      | D <sub>2</sub>  | -2320.747067  | 721.27 | 2   | 307.52 | 36.94 | -22.37  |

- (a) Point Group, total energy at B3LYP/6-311+G(2d,p)+D3(BJ) (hartrees), zero-point energies (kcal.mol<sup>-1</sup>), number of imaginary frequencies, entropies (cal.mol<sup>-1</sup>.K<sup>-1</sup>), heat capacity correction to 298K (kcal.mol<sup>-1</sup>), and free energy of solvation in dichloromethane (kcal.mol<sup>-1</sup>) using the SMD solvation model. Geometries, frequencies, and solvation at the B3LYP/6-31+G(d)+D3(BJ) level. Single-point energies at B3LYP/6-311+G(2d,p)+D3(BJ) level.
- (b) Number of imaginary frequencies. For species labelled with “TS”, the NIF value is the value of the single imaginary frequencies in cm<sup>-1</sup>.
- (c) Solvation free energies (kcal.mol<sup>-1</sup>) determined by the difference in SMD(CH<sub>2</sub>Cl<sub>2</sub>)/B3LYP/6-31+G(d)+D3(BJ) and B3LYP/6-31+G(d)+D3(BJ) energies.

**Table S2** Cartesian coordinates of all the detectable species at B3LYP/6-311+G\*\* level

**4-Idip-P<sub>2</sub>B<sub>4</sub>Br<sub>3</sub><sup>(+)</sup>, 1a**

---

|    |             |             |             |
|----|-------------|-------------|-------------|
| P  | -0.00066400 | -0.00016500 | -3.42571400 |
| B  | 0.10824900  | -1.25888800 | -1.84480700 |
| B  | 0.10792300  | 1.25880700  | -1.84487600 |
| B  | 0.15414100  | -0.00008900 | -0.64460000 |
| P  | 1.70439300  | 0.00040700  | -1.91574600 |
| B  | -1.10583500 | -0.00013900 | -1.76715400 |
| Br | -3.01501900 | -0.00043400 | -1.77475200 |
| Br | 0.04053900  | -3.17186300 | -1.82933000 |
| Br | 0.03850700  | 3.17173500  | -1.82928500 |
| C  | 0.31492600  | -0.00000900 | 0.90556500  |
| N  | 1.49643900  | 0.00023700  | 1.57328900  |
| N  | -0.64954500 | -0.00020700 | 1.85207400  |
| C  | 1.26908600  | 0.00015400  | 2.93567100  |
| C  | -0.07697100 | -0.00026000 | 3.10992500  |
| H  | 2.07855300  | 0.00033900  | 3.64219700  |
| H  | -0.68165100 | -0.00056700 | 3.99848600  |
| C  | -2.08724900 | -0.00055200 | 1.65523700  |
| C  | -2.74250900 | -1.23920900 | 1.60864100  |
| C  | -2.74315600 | 1.23776800  | 1.60883600  |
| C  | -4.13674200 | -1.20831900 | 1.54974500  |
| C  | -4.13739700 | 1.20615500  | 1.54999500  |

|   |             |             |             |
|---|-------------|-------------|-------------|
| C | -4.82487300 | -0.00126000 | 1.53228000  |
| H | -4.68997500 | -2.13685800 | 1.50913600  |
| H | -4.69113500 | 2.13439500  | 1.50961100  |
| H | -5.90755600 | -0.00155700 | 1.49016700  |
| C | 2.81278000  | 0.00070800  | 0.96813700  |
| C | 3.41539400  | 1.24168700  | 0.69582200  |
| C | 3.41632500  | -1.23985400 | 0.69601200  |
| C | 4.68523200  | 1.20897100  | 0.11556000  |
| C | 4.68615700  | -1.20630700 | 0.11575900  |
| C | 5.31118800  | 0.00153800  | -0.17027300 |
| H | 5.18821200  | 2.13677600  | -0.11955400 |
| H | 5.18978100  | -2.13380700 | -0.11917900 |
| H | 6.29578000  | 0.00191500  | -0.62249600 |
| C | -1.98912900 | -2.56022800 | 1.63751000  |
| C | -2.62096500 | -3.61442500 | 0.71817100  |
| C | -1.87631000 | -3.09798200 | 3.07586400  |
| H | -0.97541900 | -2.38021700 | 1.26776300  |
| H | -2.77864300 | -3.22569100 | -0.28880000 |
| H | -1.96468300 | -4.48422600 | 0.64760800  |
| H | -3.58055700 | -3.96267300 | 1.10663200  |
| H | -1.36755300 | -2.39463500 | 3.73835600  |
| H | -2.86874300 | -3.28992800 | 3.49121200  |
| H | -1.31701100 | -4.03677200 | 3.08818200  |
| C | -1.99049700 | 2.55921000  | 1.63783700  |
| C | -1.87774500 | 3.09678600  | 3.07626300  |
| C | -2.62297800 | 3.61321200  | 0.71872300  |
| H | -0.97673200 | 2.37982400  | 1.26795200  |
| H | -1.36857600 | 2.39352800  | 3.73853500  |
| H | -1.31888900 | 4.03583500  | 3.08865700  |
| H | -2.87019100 | 3.28820300  | 3.49182600  |
| H | -2.78046300 | 3.22455700  | -0.28830600 |

|   |             |             |             |
|---|-------------|-------------|-------------|
| H | -3.58275400 | 3.96084500  | 1.10727700  |
| H | -1.96719400 | 4.48339600  | 0.64829400  |
| C | 2.74480100  | -2.56199800 | 1.03614700  |
| C | 3.07564400  | -2.98206200 | 2.48154100  |
| C | 3.12002900  | -3.69043700 | 0.06688600  |
| H | 1.66211600  | -2.41987900 | 0.96711000  |
| H | 2.75662900  | -2.23821900 | 3.21293400  |
| H | 2.57840800  | -3.92432200 | 2.72337300  |
| H | 4.15243500  | -3.12719000 | 2.59837700  |
| H | 2.99048500  | -3.39345800 | -0.97447200 |
| H | 4.15425200  | -4.01269500 | 0.20799600  |
| H | 2.48304400  | -4.55787600 | 0.24934800  |
| C | 2.74286800  | 2.56333400  | 1.03582900  |
| C | 3.11746900  | 3.69210100  | 0.06669400  |
| C | 3.07313700  | 2.98362600  | 2.48130800  |
| H | 1.66030100  | 2.42044400  | 0.96659200  |
| H | 2.98832300  | 3.39510300  | -0.97470400 |
| H | 2.47986300  | 4.55908300  | 0.24913200  |
| H | 4.15145100  | 4.01503900  | 0.20804200  |
| H | 2.75464400  | 2.23948300  | 3.21262600  |
| H | 4.14979400  | 3.12963800  | 2.59829500  |
| H | 2.57508000  | 3.92546000  | 2.72309700  |

**1,6-Idip<sub>2</sub>-P<sub>2</sub>B<sub>4</sub>Br<sub>3</sub><sup>(+)</sup>, 1b**

-----

|   |         |         |         |
|---|---------|---------|---------|
| P | -1.6040 | -1.1002 | 0.0000  |
| P | -2.1983 | 1.4783  | 0.0000  |
| B | -1.0265 | 0.4171  | 1.2183  |
| B | -1.0265 | 0.4171  | -1.2183 |
| B | -0.2794 | 1.5314  | 0.0000  |
| B | 0.1524  | -0.0547 | 0.0000  |

|    |         |         |         |
|----|---------|---------|---------|
| Br | 1.8099  | -1.0330 | 0.0000  |
| Br | -0.8010 | 0.4970  | 3.1403  |
| Br | -0.8010 | 0.4970  | -3.1403 |
| C  | 0.5839  | 2.8457  | 0.0000  |
| C  | 1.0756  | 5.0457  | 0.0000  |
| C  | 2.2499  | 4.3616  | 0.0000  |
| C  | -0.7094 | -2.8550 | 0.0000  |
| C  | -0.6844 | -5.0024 | 0.6787  |
| C  | -0.6844 | -5.0024 | -0.6787 |
| C  | -0.5904 | -3.2570 | 2.4701  |
| C  | -1.7735 | -2.9606 | 3.1696  |
| C  | 0.6921  | -3.2402 | 3.0611  |
| C  | -1.6438 | -2.6128 | 4.5206  |
| C  | 0.7594  | -2.8562 | 4.4050  |
| C  | -0.3932 | -2.5491 | 5.1278  |
| C  | -0.5904 | -3.2570 | -2.4701 |
| C  | 0.6921  | -3.2402 | -3.0611 |
| C  | -1.7735 | -2.9606 | -3.1696 |
| C  | 0.7594  | -2.8562 | -4.4050 |
| C  | -1.6438 | -2.6128 | -4.5206 |
| C  | -0.3932 | -2.5491 | -5.1278 |
| C  | 2.9858  | 2.0234  | 0.0000  |
| C  | 3.4941  | 1.6060  | -1.2415 |
| C  | 3.4941  | 1.6060  | 1.2415  |
| C  | 4.6227  | 0.7781  | -1.2110 |
| C  | 4.6227  | 0.7781  | 1.2110  |
| C  | 5.1884  | 0.3805  | 0.0000  |
| C  | -1.3291 | 4.5102  | 0.0000  |
| C  | -1.9556 | 4.7146  | -1.2428 |
| C  | -1.9556 | 4.7146  | 1.2428  |
| C  | -3.2652 | 5.2083  | -1.2110 |

|   |         |         |         |
|---|---------|---------|---------|
| C | -3.2652 | 5.2083  | 1.2110  |
| C | -3.9075 | 5.4633  | 0.0000  |
| C | -3.1572 | -3.0853 | -2.5417 |
| C | -3.8524 | -4.3674 | -3.0441 |
| C | -4.0364 | -1.8462 | -2.7924 |
| C | -3.1572 | -3.0853 | 2.5417  |
| C | -4.0364 | -1.8462 | 2.7924  |
| C | -3.8524 | -4.3674 | 3.0441  |
| C | 1.9379  | -3.7536 | -2.3423 |
| C | 3.2113  | -2.9414 | -2.6381 |
| C | 2.1829  | -5.2332 | -2.7155 |
| C | 1.9379  | -3.7536 | 2.3423  |
| C | 2.1829  | -5.2332 | 2.7155  |
| C | 3.2113  | -2.9414 | 2.6381  |
| C | 2.8527  | 2.0195  | 2.5615  |
| C | 3.6247  | 3.1845  | 3.2110  |
| C | 2.7157  | 0.8354  | 3.5329  |
| C | 2.8527  | 2.0195  | -2.5615 |
| C | 2.7157  | 0.8354  | -3.5329 |
| C | 3.6247  | 3.1845  | -3.2110 |
| C | -1.2639 | 4.3896  | 2.5631  |
| C | -2.2268 | 3.7829  | 3.5986  |
| C | -0.5588 | 5.6310  | 3.1467  |
| C | -1.2639 | 4.3896  | -2.5631 |
| C | -0.5588 | 5.6310  | -3.1467 |
| C | -2.2268 | 3.7829  | -3.5986 |
| N | 0.0645  | 4.1076  | 0.0000  |
| N | 1.9333  | 3.0175  | 0.0000  |
| N | -0.6895 | -3.6738 | 1.0833  |
| N | -0.6895 | -3.6738 | -1.0833 |
| H | 0.8601  | 6.1019  | 0.0000  |

|   |         |         |         |
|---|---------|---------|---------|
| H | 3.2756  | 4.6936  | 0.0000  |
| H | -0.6784 | -5.8083 | 1.3942  |
| H | -0.6784 | -5.8083 | -1.3942 |
| H | -2.5327 | -2.3881 | 5.1015  |
| H | 1.7235  | -2.8192 | 4.9020  |
| H | -0.3142 | -2.2696 | 6.1751  |
| H | 1.7235  | -2.8192 | -4.9020 |
| H | -2.5327 | -2.3881 | -5.1015 |
| H | -0.3142 | -2.2696 | -6.1751 |
| H | 5.0564  | 0.4279  | -2.1422 |
| H | 5.0564  | 0.4279  | 2.1422  |
| H | 6.0690  | -0.2566 | 0.0000  |
| H | -3.7955 | 5.3829  | -2.1411 |
| H | -3.7955 | 5.3829  | 2.1411  |
| H | -4.9242 | 5.8470  | 0.0000  |
| H | -3.0415 | -3.1842 | -1.4572 |
| H | -3.2543 | -5.2594 | -2.8231 |
| H | -4.8320 | -4.4843 | -2.5659 |
| H | -4.0063 | -4.3283 | -4.1287 |
| H | -3.5373 | -0.9270 | -2.4723 |
| H | -4.2907 | -1.7400 | -3.8529 |
| H | -4.9767 | -1.9397 | -2.2372 |
| H | -3.0415 | -3.1842 | 1.4572  |
| H | -3.5373 | -0.9270 | 2.4723  |
| H | -4.9767 | -1.9397 | 2.2372  |
| H | -4.2907 | -1.7400 | 3.8529  |
| H | -3.2543 | -5.2594 | 2.8231  |
| H | -4.0063 | -4.3283 | 4.1287  |
| H | -4.8320 | -4.4843 | 2.5659  |
| H | 1.7613  | -3.7035 | -1.2634 |
| H | 3.0655  | -1.8741 | -2.4662 |

|   |         |         |         |
|---|---------|---------|---------|
| H | 4.0236  | -3.2835 | -1.9862 |
| H | 3.5476  | -3.0795 | -3.6722 |
| H | 1.3199  | -5.8671 | -2.4902 |
| H | 2.3909  | -5.3280 | -3.7877 |
| H | 3.0453  | -5.6274 | -2.1648 |
| H | 1.7613  | -3.7035 | 1.2634  |
| H | 1.3199  | -5.8671 | 2.4902  |
| H | 3.0453  | -5.6274 | 2.1648  |
| H | 2.3909  | -5.3280 | 3.7877  |
| H | 3.0655  | -1.8741 | 2.4662  |
| H | 3.5476  | -3.0795 | 3.6722  |
| H | 4.0236  | -3.2835 | 1.9862  |
| H | 1.8346  | 2.3667  | 2.3527  |
| H | 3.6717  | 4.0577  | 2.5504  |
| H | 3.1386  | 3.4912  | 4.1446  |
| H | 4.6532  | 2.8845  | 3.4447  |
| H | 2.1947  | 0.0024  | 3.0564  |
| H | 3.6920  | 0.4840  | 3.8860  |
| H | 2.1320  | 1.1363  | 4.4090  |
| H | 1.8346  | 2.3667  | -2.3527 |
| H | 2.1947  | 0.0024  | -3.0564 |
| H | 2.1320  | 1.1363  | -4.4090 |
| H | 3.6920  | 0.4840  | -3.8860 |
| H | 3.6717  | 4.0577  | -2.5504 |
| H | 4.6532  | 2.8845  | -3.4447 |
| H | 3.1386  | 3.4912  | -4.1446 |
| H | -0.4980 | 3.6297  | 2.3670  |
| H | -2.7963 | 2.9504  | 3.1743  |
| H | -1.6567 | 3.3977  | 4.4501  |
| H | -2.9326 | 4.5283  | 3.9825  |
| H | 0.1877  | 6.0399  | 2.4573  |



|   |         |        |         |
|---|---------|--------|---------|
| H | -1.2870 | 6.4219 | 3.3617  |
| H | -0.0486 | 5.3738 | 4.0825  |
| H | -0.4980 | 3.6297 | -2.3670 |
| H | 0.1877  | 6.0399 | -2.4573 |
| H | -0.0486 | 5.3738 | -4.0825 |
| H | -1.2870 | 6.4219 | -3.3617 |
| H | -2.7963 | 2.9504 | -3.1743 |
| H | -2.9326 | 4.5283 | -3.9825 |
| H | -1.6567 | 3.3977 | -4.4501 |

#### 4-Idip-As<sub>2</sub>B<sub>4</sub>Br<sub>3</sub><sup>(+)</sup>, 2

---

|    |          |          |          |
|----|----------|----------|----------|
| As | 0.10756  | -0.00039 | -3.3528  |
| B  | 0.11309  | -1.28181 | -1.60058 |
| B  | 0.11358  | 1.28154  | -1.60094 |
| B  | 0.12132  | 0.00004  | -0.42388 |
| As | 1.87658  | -0.00052 | -1.61442 |
| B  | -1.07811 | 0.00009  | -1.6211  |
| Br | -2.99159 | 0.00043  | -1.68861 |
| Br | -0.0016  | -3.19375 | -1.53512 |
| Br | 0.       | 3.19358  | -1.53652 |
| C  | 0.16986  | -0.00025 | 1.13776  |
| N  | 1.30461  | -0.00091 | 1.88583  |
| N  | -0.85432 | -0.0006  | 2.0219   |
| C  | 0.98805  | -0.0018  | 3.2307   |
| C  | -0.36521 | -0.0016  | 3.31506  |
| H  | 1.74975  | -0.0024  | 3.98855  |
| H  | -1.02777 | -0.00194 | 4.16119  |
| C  | -2.28021 | 0.00036  | 1.74937  |
| C  | -2.93472 | -1.23748 | 1.67537  |
| C  | -2.93301 | 1.23912  | 1.67512  |

|   |          |          |          |
|---|----------|----------|----------|
| C | -4.3246  | -1.20518 | 1.5507   |
| C | -4.3229  | 1.20872  | 1.55041  |
| C | -5.01006 | 0.00223  | 1.49935  |
| H | -4.87627 | -2.13313 | 1.48506  |
| H | -4.8733  | 2.1374   | 1.48454  |
| H | -6.0895  | 0.00298  | 1.40552  |
| C | 2.66336  | -0.00037 | 1.38625  |
| C | 3.28797  | 1.24052  | 1.16721  |
| C | 3.28884  | -1.24072 | 1.16687  |
| C | 4.60494  | 1.20817  | 0.70278  |
| C | 4.60585  | -1.20734 | 0.70253  |
| C | 5.25453  | 0.00066  | 0.47479  |
| H | 5.1265   | 2.13629  | 0.51354  |
| H | 5.12806  | -2.13507 | 0.51312  |
| H | 6.27608  | 0.00109  | 0.11373  |
| C | -2.18668 | -2.56019 | 1.74236  |
| C | -2.78884 | -3.62095 | 0.81082  |
| C | -2.12739 | -3.08824 | 3.18763  |
| H | -1.16026 | -2.38573 | 1.40699  |
| H | -2.91179 | -3.24017 | -0.20392 |
| H | -2.13173 | -4.49198 | 0.76961  |
| H | -3.76123 | -3.96509 | 1.17017  |
| H | -1.63739 | -2.38424 | 3.86317  |
| H | -3.13493 | -3.2717  | 3.56913  |
| H | -1.57469 | -4.0303  | 3.22541  |
| C | -2.18309 | 2.56079  | 1.74205  |
| C | -2.1214  | 3.08786  | 3.18759  |
| C | -2.78476 | 3.623    | 0.81189  |
| H | -1.15729 | 2.38513  | 1.40542  |
| H | -1.63161 | 2.38279  | 3.86214  |
| H | -1.56736 | 4.02914  | 3.22532  |

|   |          |          |          |
|---|----------|----------|----------|
| H | -3.12826 | 3.27249  | 3.57033  |
| H | -2.90943 | 3.24305  | -0.20296 |
| H | -3.75621 | 3.96839  | 1.17258  |
| H | -2.1264  | 4.49307  | 0.77045  |
| C | 2.58661  | -2.56247 | 1.43801  |
| C | 2.8133   | -3.00762 | 2.89569  |
| C | 3.01862  | -3.67591 | 0.47515  |
| H | 1.51279  | -2.41027 | 1.29676  |
| H | 2.45089  | -2.27053 | 3.61391  |
| H | 2.29121  | -3.94783 | 3.08791  |
| H | 3.87787  | -3.16595 | 3.08519  |
| H | 2.95152  | -3.36099 | -0.56719 |
| H | 4.04197  | -4.00342 | 0.67208  |
| H | 2.36992  | -4.54423 | 0.60353  |
| C | 2.58479  | 2.56166  | 1.43892  |
| C | 3.01731  | 3.67639  | 0.4778   |
| C | 2.80957  | 3.00541  | 2.89733  |
| H | 1.51121  | 2.40908  | 1.29627  |
| H | 2.95158  | 3.36261  | -0.56497 |
| H | 2.368    | 4.54421  | 0.60643  |
| H | 4.04025  | 4.00422  | 0.6763   |
| H | 2.44665  | 2.26745  | 3.61439  |
| H | 3.87384  | 3.16405  | 3.08822  |
| H | 2.28681  | 3.94517  | 3.0899   |

**3,5-Idip<sub>2</sub>-P<sub>2</sub>B<sub>4</sub>Br<sub>2</sub><sup>(2+)</sup>, 3**

---

|    |             |             |             |
|----|-------------|-------------|-------------|
| P  | -0.06569500 | 0.08698400  | 1.69253300  |
| B  | -1.24691900 | 0.11697900  | 0.05217400  |
| B  | 1.25028400  | 0.02190800  | 0.15029700  |
| B  | 0.04846300  | 0.04682300  | -1.10092600 |
| P  | 0.06641700  | 1.66894100  | 0.08926800  |
| B  | -0.04439100 | -1.15082500 | 0.09528000  |
| Br | -0.12694400 | -3.04981700 | 0.07366500  |
| Br | 0.11453400  | -0.00828200 | -3.00843400 |
| C  | 2.79999500  | 0.06097400  | 0.22760100  |
| N  | 3.56594900  | 1.18190400  | 0.17994600  |
| N  | 3.65624100  | -0.96889500 | 0.40187800  |
| C  | 4.89674600  | 0.85009300  | 0.33033400  |
| C  | 4.95328500  | -0.50177800 | 0.46647100  |
| H  | 5.66963300  | 1.59714400  | 0.33030300  |
| H  | 5.78401100  | -1.17148100 | 0.60137700  |
| C  | -2.78793200 | 0.27498200  | -0.04749600 |
| N  | -3.45542500 | 1.45723000  | -0.01844900 |
| N  | -3.72872800 | -0.68187300 | -0.20739500 |
| C  | -4.80987600 | 1.23920500  | -0.16426900 |
| C  | -4.98106200 | -0.10486200 | -0.28128500 |
| H  | -5.51681500 | 2.04936100  | -0.16129000 |
| H  | -5.86715600 | -0.70335700 | -0.39648900 |
| C  | -2.85108800 | 2.74566900  | 0.24676100  |
| C  | -2.69892000 | 3.12669900  | 1.59048500  |
| C  | -2.42719100 | 3.52380200  | -0.84161700 |
| C  | -2.08182200 | 4.35680800  | 1.82885300  |
| C  | -1.82916800 | 4.75005300  | -0.54178800 |
| C  | -1.65642300 | 5.15815000  | 0.77529800  |
| H  | -1.94596900 | 4.69786200  | 2.84672800  |
| H  | -1.48869100 | 5.38796500  | -1.34602200 |
| H  | -1.19128300 | 6.11411100  | 0.98411300  |

|   |             |             |             |
|---|-------------|-------------|-------------|
| C | -3.53278700 | -2.11943900 | -0.16687200 |
| C | -3.40852700 | -2.81239300 | -1.37837100 |
| C | -3.56411100 | -2.73678700 | 1.09150900  |
| C | -3.34665600 | -4.20470600 | -1.29871000 |
| C | -3.49659200 | -4.13089900 | 1.11021800  |
| C | -3.40045800 | -4.85574900 | -0.07125600 |
| H | -3.25489400 | -4.78733000 | -2.20559000 |
| H | -3.52454600 | -4.65419300 | 2.05758300  |
| H | -3.36172200 | -5.93791600 | -0.03595400 |
| C | 3.32190600  | -2.37426300 | 0.52461500  |
| C | 3.37149800  | -3.16204700 | -0.63241100 |
| C | 3.04884300  | -2.87388700 | 1.80559100  |
| C | 3.17085200  | -4.53373600 | -0.46500400 |
| C | 2.85203000  | -4.25124200 | 1.91263900  |
| C | 2.92516100  | -5.07198000 | 0.79244000  |
| H | 3.20716200  | -5.18706000 | -1.32716300 |
| H | 2.64502000  | -4.68867600 | 2.88069400  |
| H | 2.78313500  | -6.14061300 | 0.90045700  |
| C | 3.06155300  | 2.53239700  | 0.04294100  |
| C | 2.69858400  | 3.21526900  | 1.21528300  |
| C | 2.93833400  | 3.07088200  | -1.24905800 |
| C | 2.18815600  | 4.50615500  | 1.06119900  |
| C | 2.41008000  | 4.36130100  | -1.34015500 |
| C | 2.04297800  | 5.06855600  | -0.20063100 |
| H | 1.89861400  | 5.07400100  | 1.93513000  |
| H | 2.29280700  | 4.82127800  | -2.31184100 |
| H | 1.64597500  | 6.07181800  | -0.29889000 |
| C | -3.68048900 | -1.95466700 | 2.39008300  |
| C | -2.56380700 | -2.32487300 | 3.37863300  |
| C | -5.06954300 | -2.13701900 | 3.02390400  |
| H | -3.56573400 | -0.89196200 | 2.16359500  |

|   |             |             |             |
|---|-------------|-------------|-------------|
| H | -1.57790700 | -2.24304300 | 2.91486300  |
| H | -2.59403200 | -1.66486900 | 4.24885800  |
| H | -2.67067800 | -3.34964000 | 3.73997400  |
| H | -5.86378600 | -1.82847800 | 2.34005200  |
| H | -5.24493600 | -3.18287100 | 3.28594300  |
| H | -5.15566700 | -1.54282800 | 3.93694000  |
| C | -3.36241900 | -2.09942100 | -2.71999700 |
| C | -4.75936300 | -2.05580900 | -3.36576800 |
| C | -2.34268300 | -2.72964400 | -3.67935900 |
| H | -3.04351600 | -1.06766400 | -2.54258800 |
| H | -5.48942400 | -1.55197500 | -2.72844700 |
| H | -4.72223600 | -1.52519400 | -4.32006900 |
| H | -5.12623400 | -3.06732100 | -3.55558400 |
| H | -1.36422100 | -2.83935800 | -3.20849800 |
| H | -2.66887500 | -3.71352200 | -4.02280500 |
| H | -2.22819700 | -2.10053800 | -4.56454600 |
| C | 2.86760800  | 2.59973900  | 2.59564800  |
| C | 1.71754600  | 2.95504800  | 3.54817400  |
| C | 4.22225200  | 3.00513900  | 3.20550400  |
| H | 2.87068800  | 1.51130600  | 2.48440600  |
| H | 0.74237300  | 2.77585300  | 3.09045700  |
| H | 1.78616400  | 2.35403700  | 4.45728300  |
| H | 1.75403800  | 4.00327500  | 3.85199600  |
| H | 5.05890900  | 2.70488900  | 2.57170000  |
| H | 4.27488600  | 4.08863400  | 3.33553300  |
| H | 4.35494400  | 2.53891800  | 4.18443300  |
| C | 3.40201900  | 2.31761700  | -2.48710600 |
| C | 4.90278300  | 2.56996500  | -2.73541200 |
| C | 2.60527700  | 2.67219400  | -3.74889100 |
| H | 3.26464600  | 1.24731000  | -2.30201600 |
| H | 5.52177300  | 2.26813400  | -1.88979100 |

|   |             |             |             |
|---|-------------|-------------|-------------|
| H | 5.23880900  | 2.01257000  | -3.61249300 |
| H | 5.08386500  | 3.63162600  | -2.91934500 |
| H | 1.52997800  | 2.59333700  | -3.58994500 |
| H | 2.82979100  | 3.68366200  | -4.09464200 |
| H | 2.87648400  | 1.98987000  | -4.55673700 |
| C | 2.99332700  | -1.97974300 | 3.03423700  |
| C | 4.29878400  | -2.07626400 | 3.84282500  |
| C | 1.77429700  | -2.28537400 | 3.91724800  |
| H | 2.89506100  | -0.94322700 | 2.69791000  |
| H | 5.16687000  | -1.80261900 | 3.23868800  |
| H | 4.26465500  | -1.41146500 | 4.70938900  |
| H | 4.45381200  | -3.09533900 | 4.20462100  |
| H | 0.84943200  | -2.29766100 | 3.33532200  |
| H | 1.86577200  | -3.25640100 | 4.40780300  |
| H | 1.67964300  | -1.53248100 | 4.70317900  |
| C | 3.64075800  | -2.57691700 | -2.00927900 |
| C | 2.61279500  | -3.05725500 | -3.04533100 |
| C | 5.07638200  | -2.88917000 | -2.46590500 |
| H | 3.54399500  | -1.48936400 | -1.94391000 |
| H | 1.59141700  | -2.87193600 | -2.70833500 |
| H | 2.76257300  | -2.53145700 | -3.99091000 |
| H | 2.71487900  | -4.12569600 | -3.24639500 |
| H | 5.81748100  | -2.50677700 | -1.75972900 |
| H | 5.22923200  | -3.96731200 | -2.55478300 |
| H | 5.27354200  | -2.43963400 | -3.44191000 |
| C | -2.61023100 | 3.06511000  | -2.27917300 |
| C | -1.44045800 | 3.47754200  | -3.18235100 |
| C | -3.94389200 | 3.58478000  | -2.84732200 |
| H | -2.65051900 | 1.97159600  | -2.28141200 |
| H | -0.47860800 | 3.20525900  | -2.74357400 |
| H | -1.52457000 | 2.97983500  | -4.15004600 |

|   |             |            |             |
|---|-------------|------------|-------------|
| H | -1.43471600 | 4.55343100 | -3.37009300 |
| H | -4.79798200 | 3.24747000 | -2.25668600 |
| H | -3.95648900 | 4.67730000 | -2.85778500 |
| H | -4.08304300 | 3.23392400 | -3.87227300 |
| C | -3.23554700 | 2.28286200 | 2.73662600  |
| C | -4.63755900 | 2.77630100 | 3.14189300  |
| C | -2.30462700 | 2.24722600 | 3.95544600  |
| H | -3.33962800 | 1.25379500 | 2.38319500  |
| H | -5.33145700 | 2.76435600 | 2.29904100  |
| H | -5.05094600 | 2.14392500 | 3.93078400  |
| H | -4.58984100 | 3.80093200 | 3.51811600  |
| H | -1.29573000 | 1.92720200 | 3.68785600  |
| H | -2.23111000 | 3.22229200 | 4.44110600  |
| H | -2.69443500 | 1.54700700 | 4.69726500  |

## References

1. D. F. Shriver and M. A. Drezdon in *The Manipulation of Air-Sensitive Compounds*, 2nd ed., John Wiley & Sons, New York, 1986.
2. P. L. Timms, *Adv. Inorg. Chem. Radiochem.*, 1972, **14**, 121.
3. M. J. Frisch, G. W. Trucks, H. B. Schlegel, G. E. Scuseria, M. A. Robb, J. R. Cheeseman, G. Scalmani, V. Barone, G. A. Petersson, H. Nakatsuji, X. Li, M. Caricato, A. V. Marenich, J. Bloino, B. G. Janesko, R. Gomperts, B. Mennucci, H. P. Hratchian, J. V. Ortiz, A. F. Izmaylov, J. L. Sonnenberg, D. Williams-Young, F. Ding, F. Lipparini, F. Egidi, J. Goings, B. Peng, A. Petrone, T. Henderson, D. Ranasinghe, V. G. Zakrzewski, J. Gao, N. Rega, G. Zheng, W. Liang, M. Hada, M. Ehara, K. Toyota, R. Fukuda, J. Hasegawa, M. Ishida, T. Nakajima, Y. Honda, O. Kitao, H. Nakai, T. Vreven, K. Throssell, J. A. Montgomery, Jr., J. E. Peralta, F. Ogliaro, M. J. Bearpark, J. J. Heyd, E. N. Brothers, K. N. Kudin, V. N. Staroverov, T. A. Keith, R. Kobayashi, J. Normand, K. Raghavachari, A. P. Rendell, J. C. Burant, S. S. Iyengar, J. Tomasi, M. Cossi, J. M. Millam, M. Klene, C. Adamo, R. Cammi, J. W. Ochterski, R. L. Martin, K. Morokuma, O. Farkas, J. B. Foresman, and D. J. Fox, *Gaussian 16, Revision C.01*, Gaussian, Inc., Wallingford CT, USA, 2016.
4. (a) G. te Velde, F. M. Bickelhaupt, E. J. Baerends, C. Fonseca Guerra, S. J. A. van Gisbergen, J. G. Snijders and T. Ziegler, *J. Comput. Chem.*, 2001, **22**, 93; (b) E. J. Baerends, J. Autschbach, A.



- Bérces, C. Bo, P. M. Boerrigter, L. Cavallo, D. P. Chong, L. Deng, R. M. Dickson, D. E. Ellis, L. Fan, T. H. Fischer, C. Fonseca Guerra, S. J. A. van Gisbergen, J. A. Groeneveld, O. V. Gritsenko, M. Grüning, F. E. Harris, P. van den Hoek, H. Jacobsen, G. van Kessel, F. Kootstra, E. van Lenthe, D. A. McCormack, V. P. Osinga, S. Patchkovskii, P. H. T. Philipsen, D. Post, C. C. Pye, W. Ravenek, P. Ros, P. R. T. Schipper, G. Schreckenbach, J. G. Snijders, M. Sola, M. Swart, D. Swerhone, G. te Velde, P. Vernooijs, L. Versluis, O. Visser, E. van Wezenbeek, G. Wiesenekker, S. K. Wolff, T. K. Woo, T. Ziegler, ADF2004.01, SCM, Theoretical Chemistry, Vrije Universiteit, Amsterdam, Netherlands, 2004.
5. (a) E. van Lenthe, E.J. Baerends and J.G. Snijders, *J. Chem. Phys.*, 1994, **101**, 9783; (b) E. van Lenthe, R. van Leeuwen, E.J. Baerends and J. G. Snijders, *Int. J. Quantum Chem.*, 1996, **57**, 281; (c) E. van Lenthe, E. J. Baerends and J. G. Snijders, *J. Chem. Phys.*, 1993, **99**, 4597.
  6. E. van Lenthe, J. G. Snijders and E. J. Baerends, *J. Chem. Phys.*, 1996, **105**, 6505.
  7. T. P. Onak, H. L. Landesman, R.E. Williams and I. Shapiro, *J. Phys. Chem.* 1959, **63**, 1533.
  8. S. K Latypov, F. M. Polyancev, D.G. Yakhvarov and O.G. Syniashin, *Phys. Chem. Chem. Phys.* 2015, **17**, 6976.
  9. MOLEKEL 4.3, P. Flükiger, H. P. Lüthi, S. Portmann, and J. Weber, Swiss Center for scientific Computing, Manno, Switzerland, 2000, <https://ugovaretto.github.io/molekel/> Accessed date 26.5.2020.
  10. K. E. Riley, K.-A., Tran, P. Lane, J. S. Murray and P. Politzer, *J. Comput. Sci.* 2016, **17**, 273.
  11. G. Knizia, *J. Chem. Theory Comput.*, 2013, **9**, 4834.
  12. *TURBOMOLE, Version 7.3, 2018, a development of University of Karlsruhe and Forschungszentrum Karlsruhe GmbH, 1989-2017, TURBOMOLE GmbH, 2007.*
